# Supplementary material for: Coexistence of open and closed type nodal line topological semimetals in two dimensional B2C
Source: Royal Society of Chemistry journal article supplement (doi:10.1039/c7tc05095j), 2018-01-01
Supplement: c7tc05095j1.pdf [file c7tc05095j1.pdf]

Supporting Information for

## Coexistence of Open and Closed Type Nodal line Topological Semimetals in Two Dimensional B<sub>2</sub>C

P. Zhou,<sup>1</sup> Z. S. Ma,<sup>2</sup> and L. Z. Sun<sup>2,\*</sup>

<sup>1</sup>Key Laboratory of Low-dimensional Materials and Application Technology,  
School of Material Sciences and Engineering, Xiangtan University, Xiangtan 411105, China

<sup>2</sup>Hunan Provincial Key laboratory of Thin Film Materials and Devices,  
School of Material Sciences and Engineering, Xiangtan University, Xiangtan 411105, China

(Dated: December 20, 2017)

### I. PHONON BAND DISPERSION OF 2D FLATTEN B<sub>2</sub>C.

We plot the phonon band dispersion of 2D flatten B<sub>2</sub>C in figure S1. Clearly, negative frequency appear around high symmetry point  $\Gamma$  and along high symmetry line  $\Gamma$ -Y.

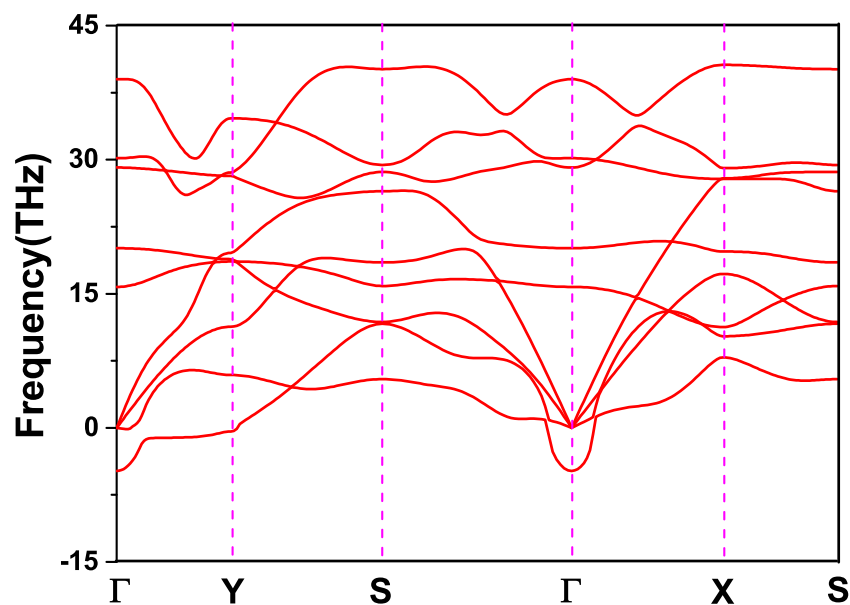

Figure S1: (color online) The Phonon band dispersion of 2D flatten B<sub>2</sub>C.

## II. THE ENERGY BAND STRUCTURE WITH HYBRID FUNCTION.

We further calculate the band structure with HSE06 hybrid functional calculations in structural relaxation and electronic self-consistent. Compared with the PBE's results. The crystal constant along x axis only reduced 0.57%(low buckled B<sub>2</sub>C) and 0.69%(flatten B<sub>2</sub>C). The y axis crystal constant almost no change. The results of energy band are shown in Fig.S2. (a) represent the result of low-buckled B<sub>2</sub>C and (b) is flatten B<sub>2</sub>C. The low energy band characters and the semimetal state discussed in our main manuscript are still exist in this exchange-correlation function. From the perspective of lattice symmetry, the semimetal states should exist because of hybrid functional wouldn't break the symmetry of 2D B<sub>2</sub>C.

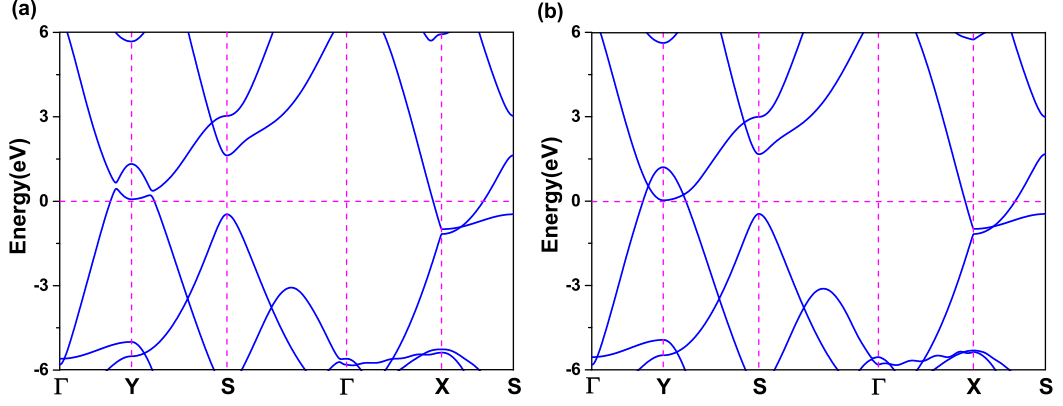

Figure S2: (color online) (a) Band structure of low-buckled B<sub>2</sub>C with HSE06 hybrid function. (b) Band structure of flat B<sub>2</sub>C with HSE06 hybrid function.

## III. THE TIGHT BINDING PARAMETERS IN FIG.5(A)(B) OF MAIN MANUSCRIPTS

Table S1: The tight binding parameters in Fig.5(a)(b) of main manuscripts.

| Parameters(eV) | $\epsilon_{1n}$ | $\epsilon_{2n}$ | $\epsilon_{3n}$ | $t_{1n}$ | $t_{2n}$ | $t_{3n}$ | $t_{4n}$ | $t_{5n}$ | $t_{6n}$ | $t_{7n}$ |
|----------------|-----------------|-----------------|-----------------|----------|----------|----------|----------|----------|----------|----------|
| $H_1(n=1)$     | -5.048          | -13.554         | -5.742          | -1.434   | -1.185   | -0.543   | -0.393   | 0.349    | -0.266   | -0.151   |
| $H_2(n=2)$     | -0.014          | 1.847           | 1.847           | -2.367   | -2.162   | -1.477   | 0.443    | 0.519    | 0.283    |          |

#### IV. THE STRUCTURE AND TOTAL ENERGY OF DIFFERENT $B_2C$ CONFIGURES ON THE SURFACE OF $Cu(110)$

With the help of CALYPSO code, we obtain many metastable structures of  $B_2C$  on the surface of  $Cu(110)$ . Here we present some of structures and energy differences of them, as shown in figure S2. Comparing the configuration in our main manuscript, a slight translation occurs for  $B_2C$  relative to the substrate in (a)(b)(c). Therefore, the energy difference of them are very small. The relatively higher energy of configuration (d) and (e) indicate that other  $B_2C$  on the surface of  $Cu(110)$  or B atom embed into the groove of  $Cu(110)$  surface are very unstable.

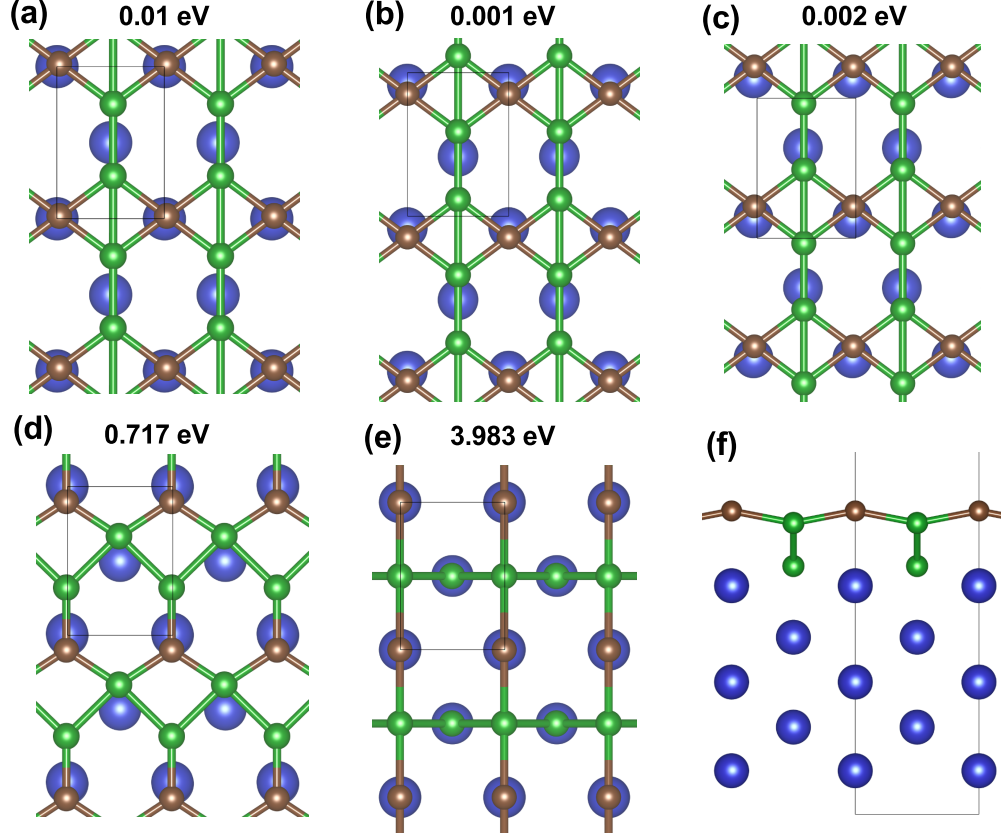

Figure S3: (color online) The structure and total energy of different  $B_2C$  configs on the surface of  $Cu(110)$ . In the top view of (a)(b)(c)(d), the B and C atoms almost share the same 2D plane. (d) and (e) are the top view and side view of same config.

## V. THE STRUCTURE OF BILAYER $B_2C$ SYNTHESIZED ON THE SURFACE OF $Cu(110)$ AND THE ENERGY BAND ALONG HIGH SYMMETRY LINES OF THE TOP LAYER $B_2C$ .

Comparing with the van der Waals interaction, the interaction between monolayer  $B_2C$  and  $Cu$  substrate is stronger (2.12 Å). Therefore, the  $p_z$  of pristine  $B_2C$  are strongly affected by the  $Cu$  substrate. From the discussions in our main manuscript, we know that the  $p_z$  states of  $B$  and  $C$  atoms participate the formation of all semimetal states. In order to detect all semimetal in experiment, here we assume the first  $B_2C$  act as buffer layer, and another layer  $B_2C$  synthesized on the first layer with Van der Waals interactions (3.42 Å). The structure are depicted in Figure S3(a)(b). With the help of maximal localized Wannier function, we plot the energy band structure of the top layer  $B_2C$ , we found three types of semimetal states (type-I, type-II Dirac semimetals and open nodal line) are well kept. However, small band gap exist around the closed nodal line for flatten  $B_2C$ , which mean this nodal line is very sensitive to the weak interaction between  $B_2C$  and substrate. If we must observe the closed nodal line in  $B_2C$ , a kind of more inert buffer materials, for example 2D BN, should be placed between  $B_2C$  and metal substrate.

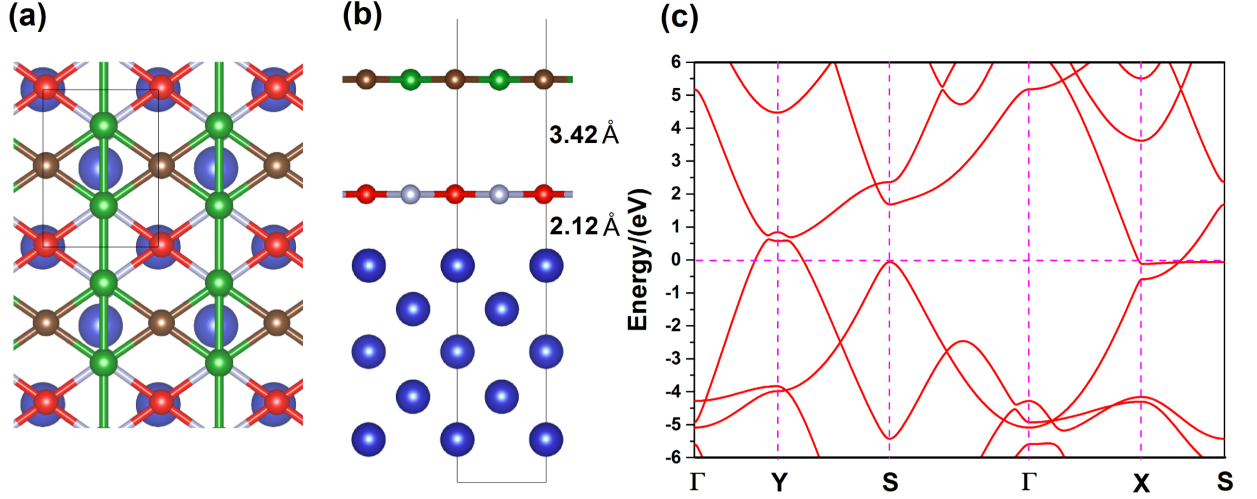

Figure S4: (color online) (a)(b) The top and side view of bilayer  $B_2C$  synthesized on the surface of  $Cu(110)$ , we use the different color to label the first and the second layer  $B_2C$ . The red and black color represent  $C$  atoms, and the gray and green color are  $B$  atoms. (c) The energy band structure along high symmetry lines of the top layer  $B_2C$ .

---

\* Electronic address: lzsun@xtu.edu.cn
